# Supplementary material for: Structural variation and eQTL analysis in two experimental populations of chickens divergently selected for feather-pecking behavior
Source: Springer Nature journal article supplement (doi:10.1007/s10048-022-00705-5), 2022-11-30

# Supplementary Information S3: Graphical representation of *ETV1* binding sites in proximity to associated differentially expressed genes.

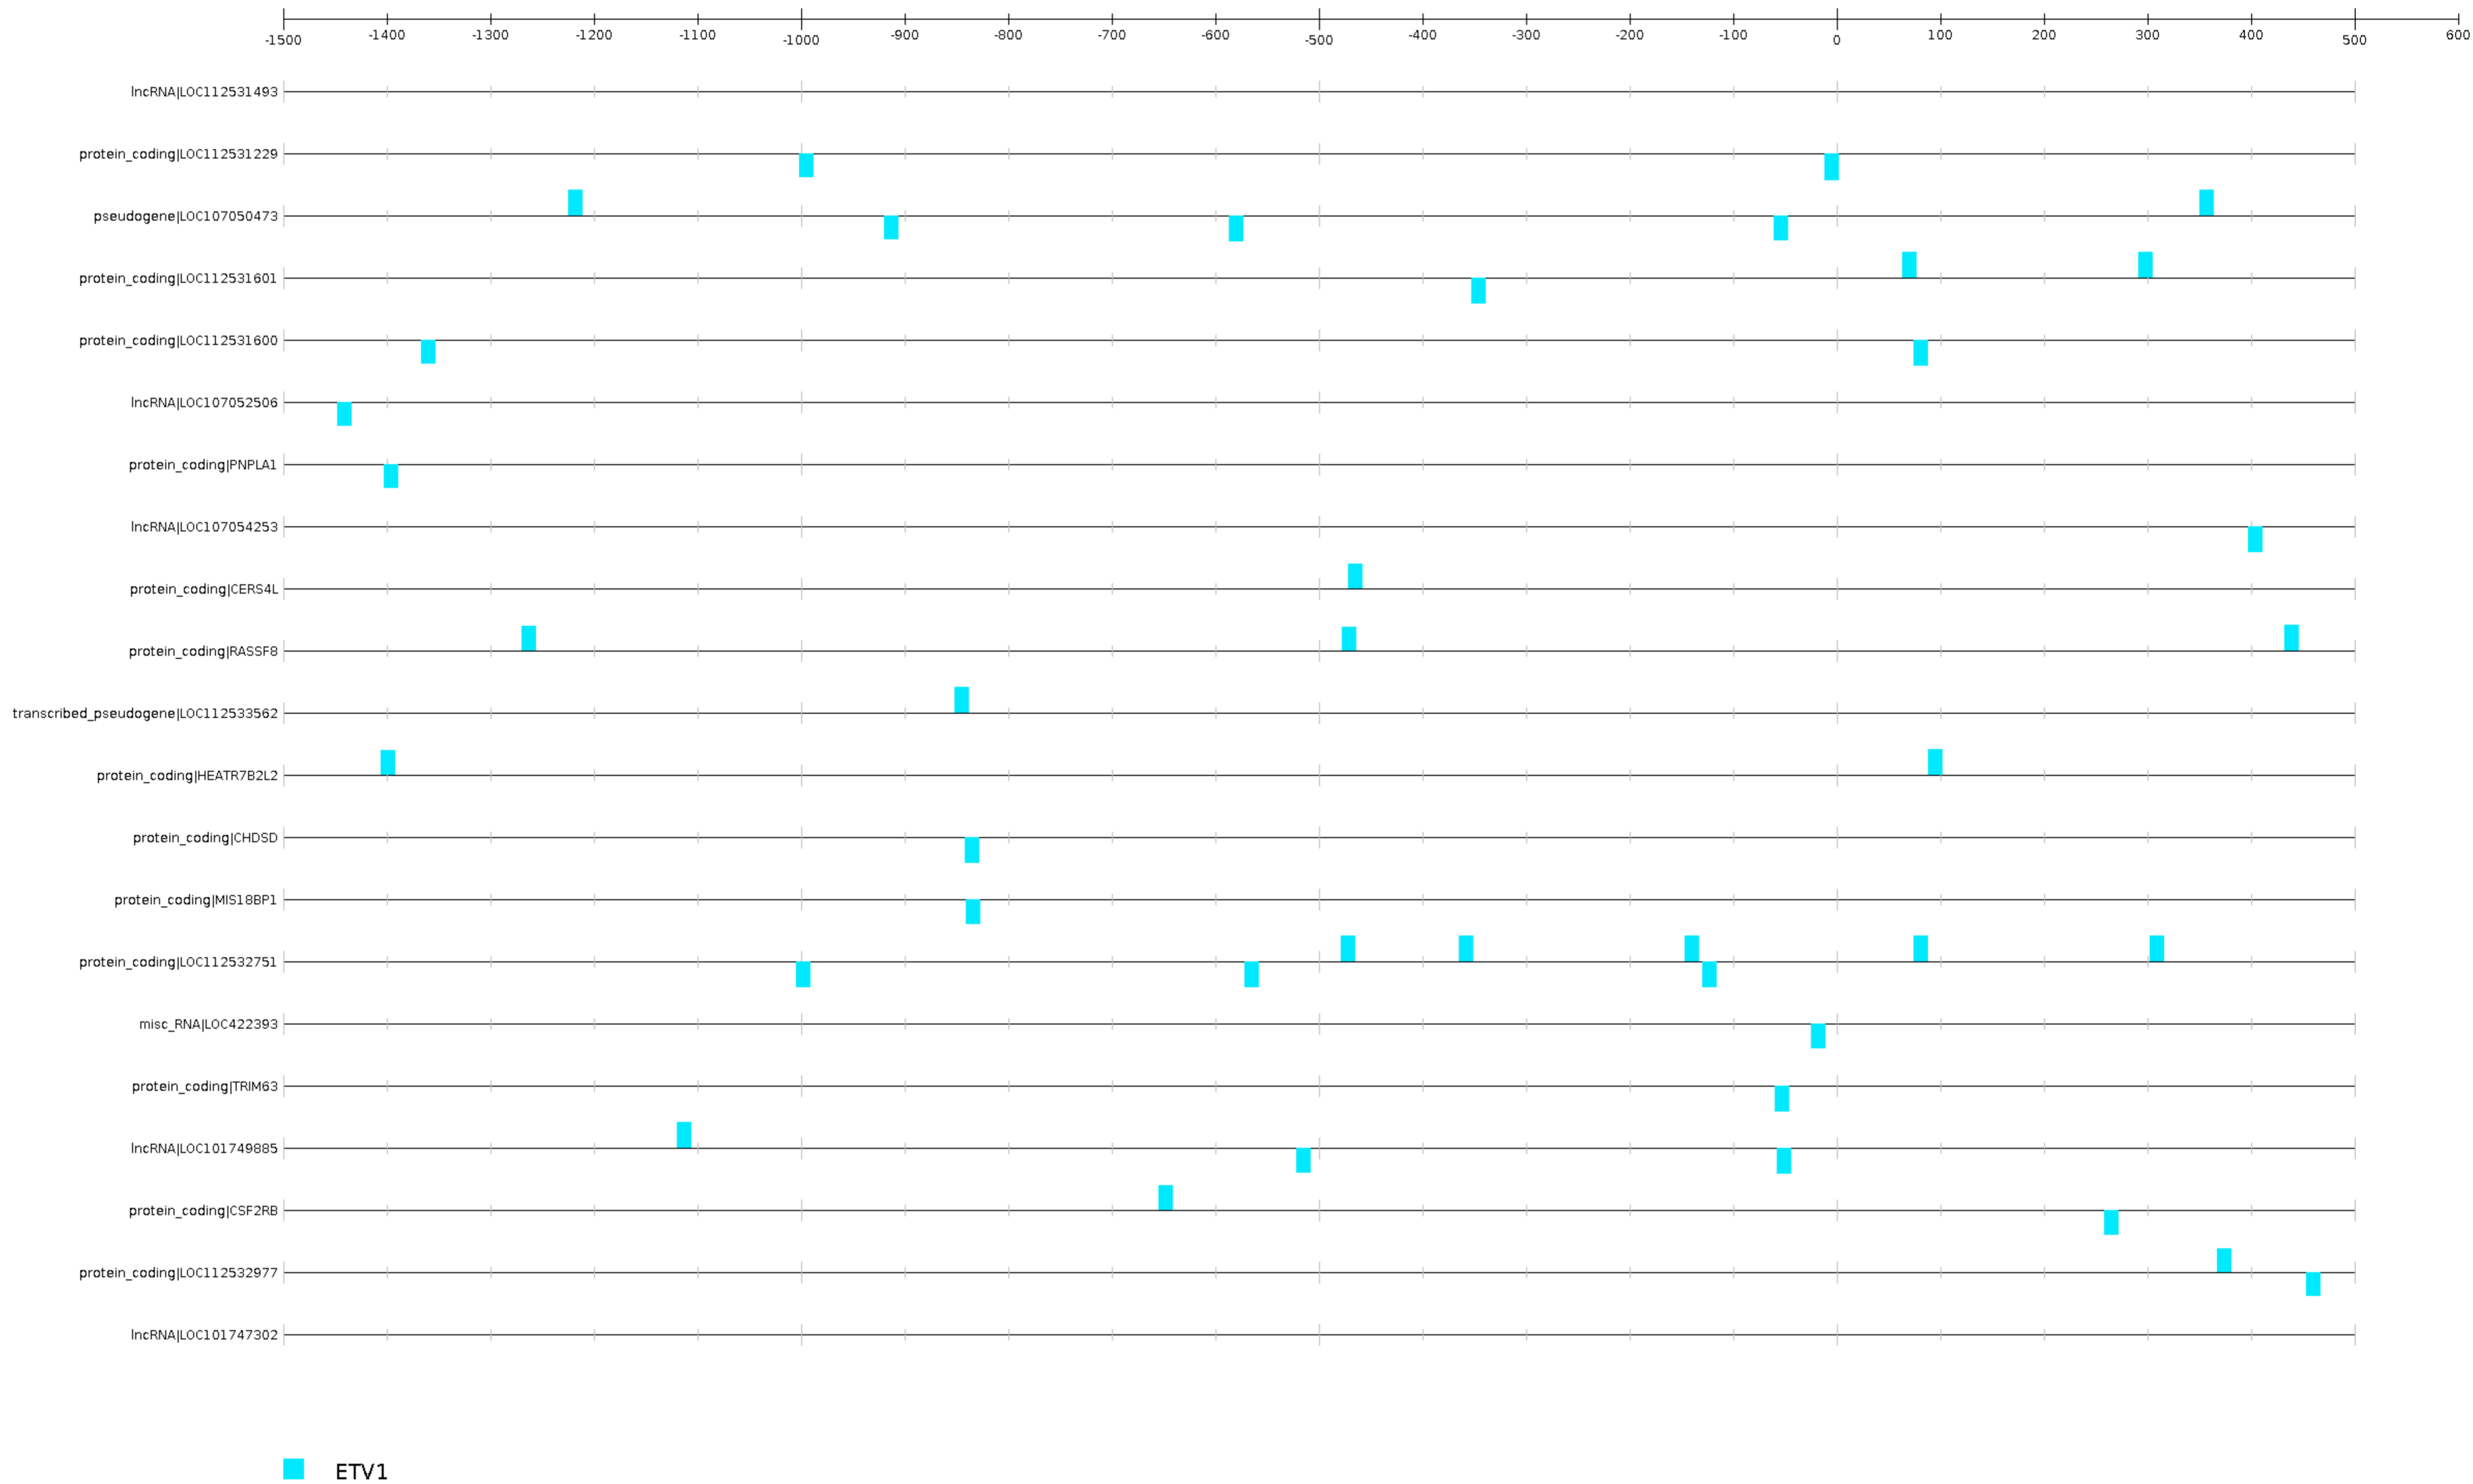

Supplement: MOESM4 [file 23772600]
